# Supplementary material for: An Environmental Niche Model to Estimate the Potential Presence of Venezuelan Equine Encephalitis Virus in Costa Rica
Source: MDPI journal article supplement (doi:10.3390/ijerph18010227), 2020-12-30
Supplement: s1 [file s1]

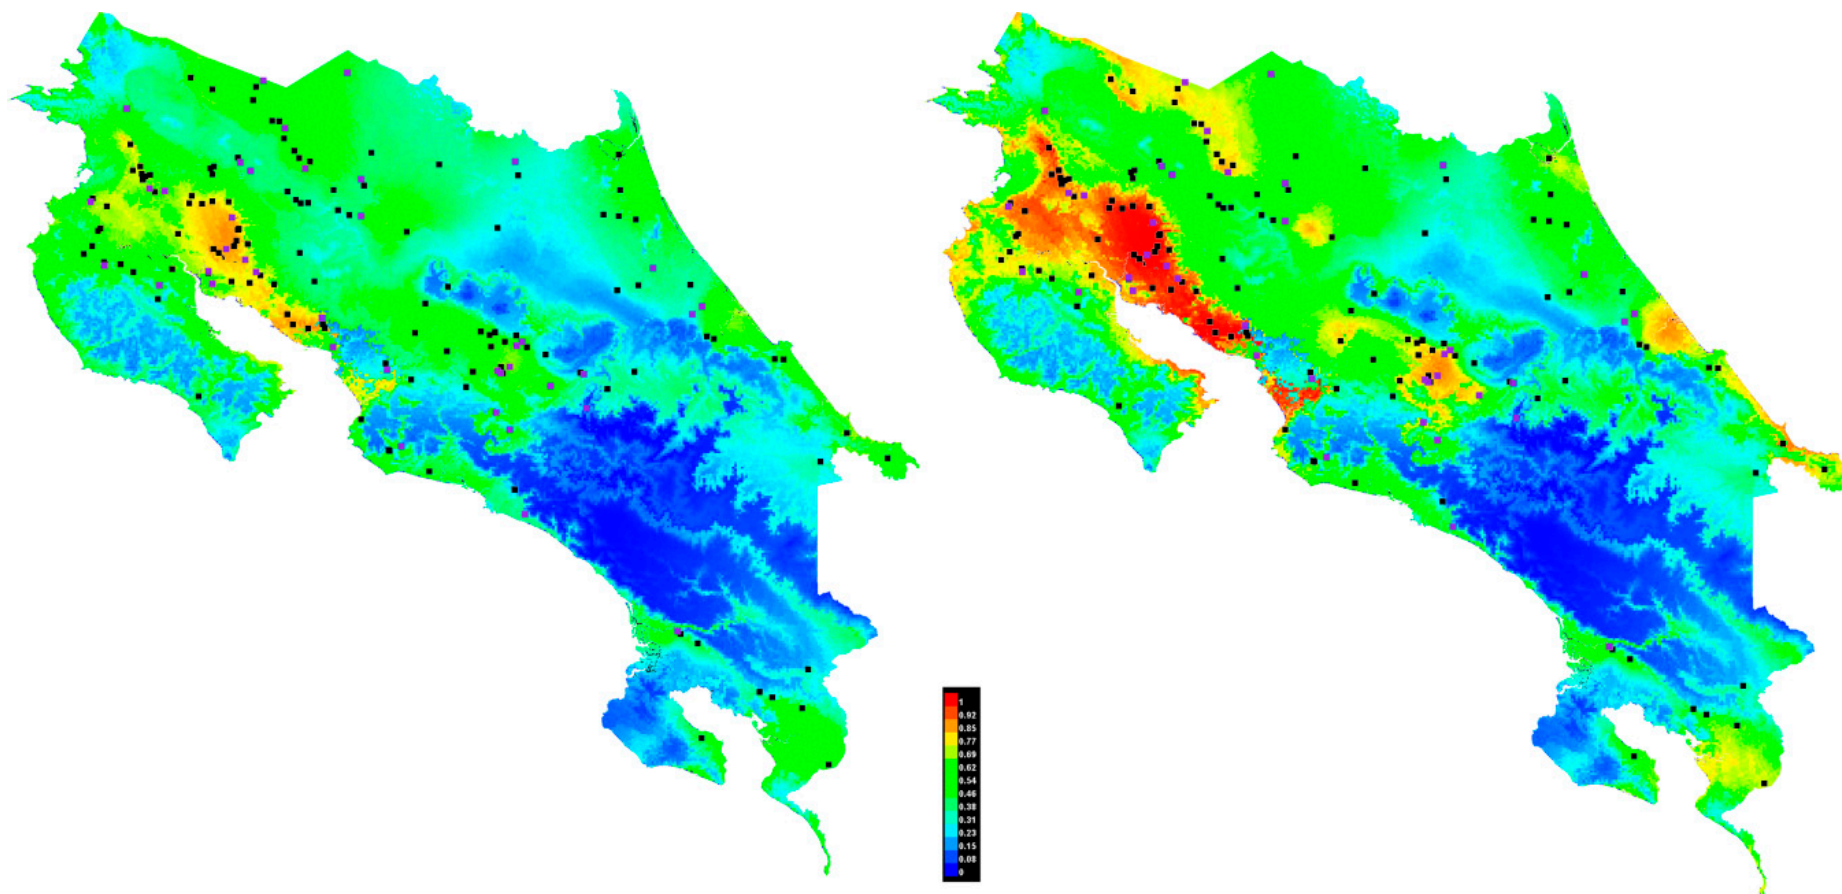

**Figure S1.** Output map styles produced by MaxEnt, in the left side is presented the logistic output format and in the right is depicted the cloglog output format.
